# Supplementary material
Source: PubMed Central journal article supplement (PMC3415544)
Supplement: mmc1.pdf [file mmc1.pdf]

The American Journal of Human Genetics, Volume 91

**Supplemental Data**

**A Haplotype at *STAT2* Introgressed from Neanderthals  
and Serves as a Candidate of Positive Selection**

**in Papua New Guinea**

**Fernando L. Mendez, Joseph C. Watkins, and Michael F. Hammer**

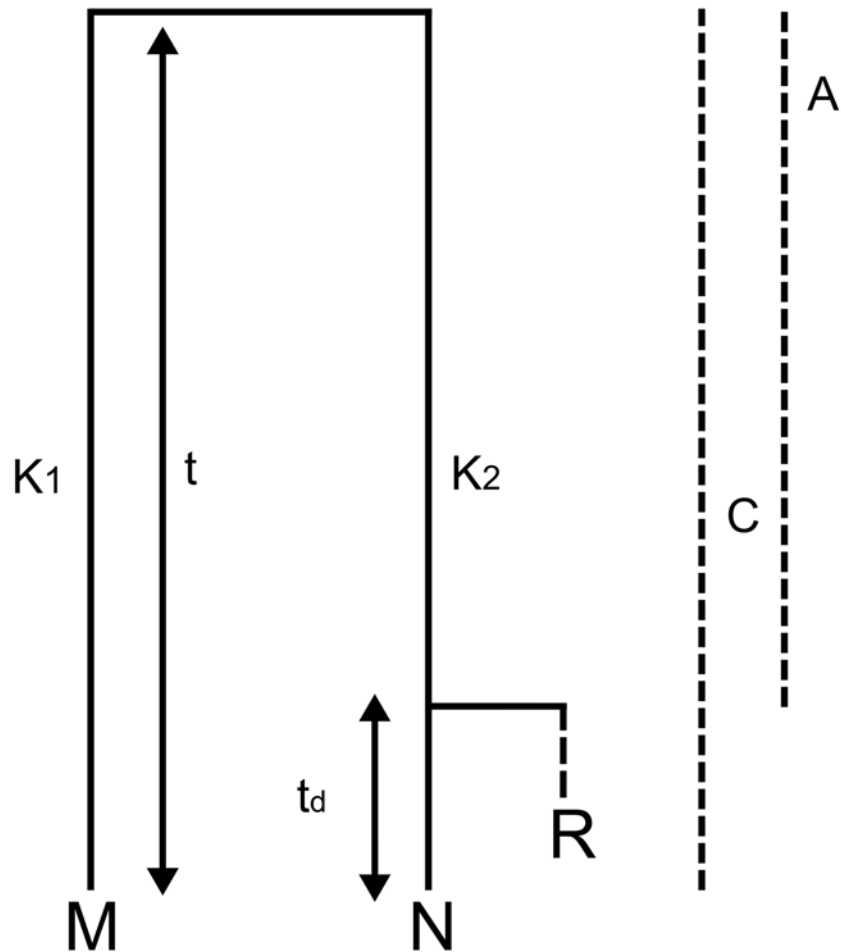

**Figure S1.** Representation of three lineages for which DNA sequence is available: The lineages **M** and **N** have complete sequence available, whereas the lineage **R** has incomplete sequence coverage. All mutations are polarized using the sequence of an outgroup.  $K_1$  and  $K_2$  mutations have occurred in the **M** and **N** lineages, respectively. The **R** lineage has sequence coverage for C of the  $K_2$  mutations and shares the derived state at A of them. The lineages **M** and **N** diverged at time  $t$  in the past, whereas the lineage **R** branched from the lineage **N** at time  $t_d$  in the past.

Figure S2

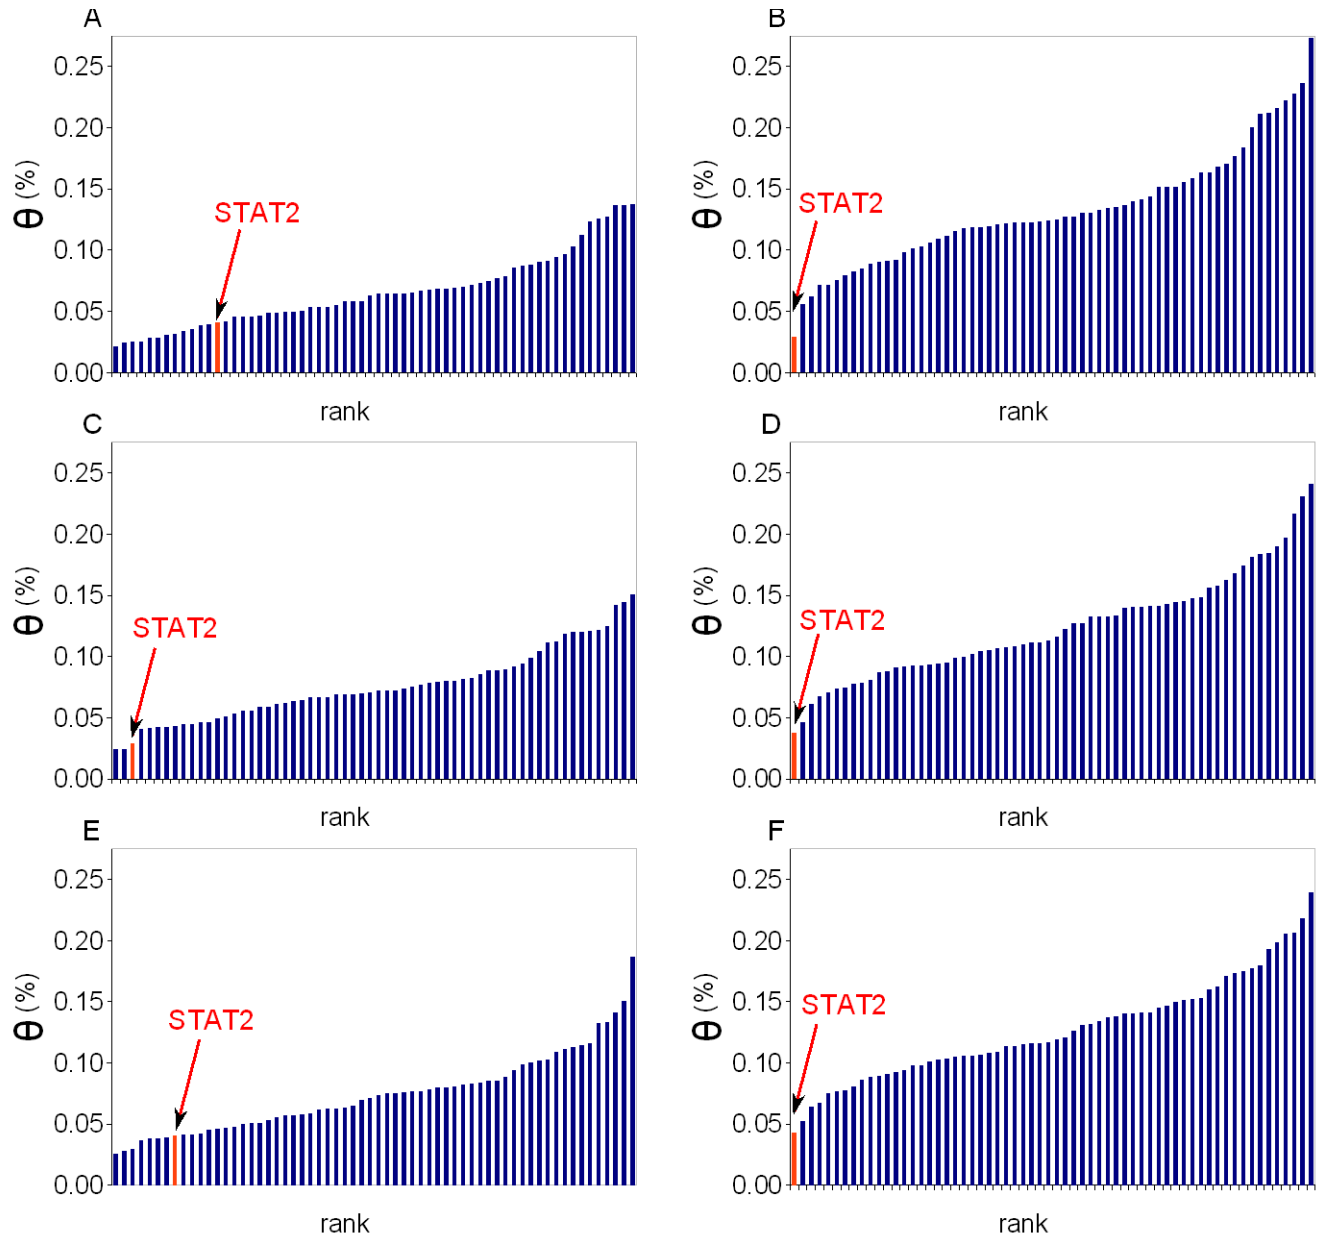

**Figure S2.** Empirical distribution of the value of  $\theta$  (%) per site for 61 intergenic loci (blue) and the parts *STAT2* resequenced here (orange) in the populations of the resequence panel: (a) Biaka, (b) Mandenka, (c) San, (d) Papuans, (e) Han, and (f) French Basque populations.

Figure S3

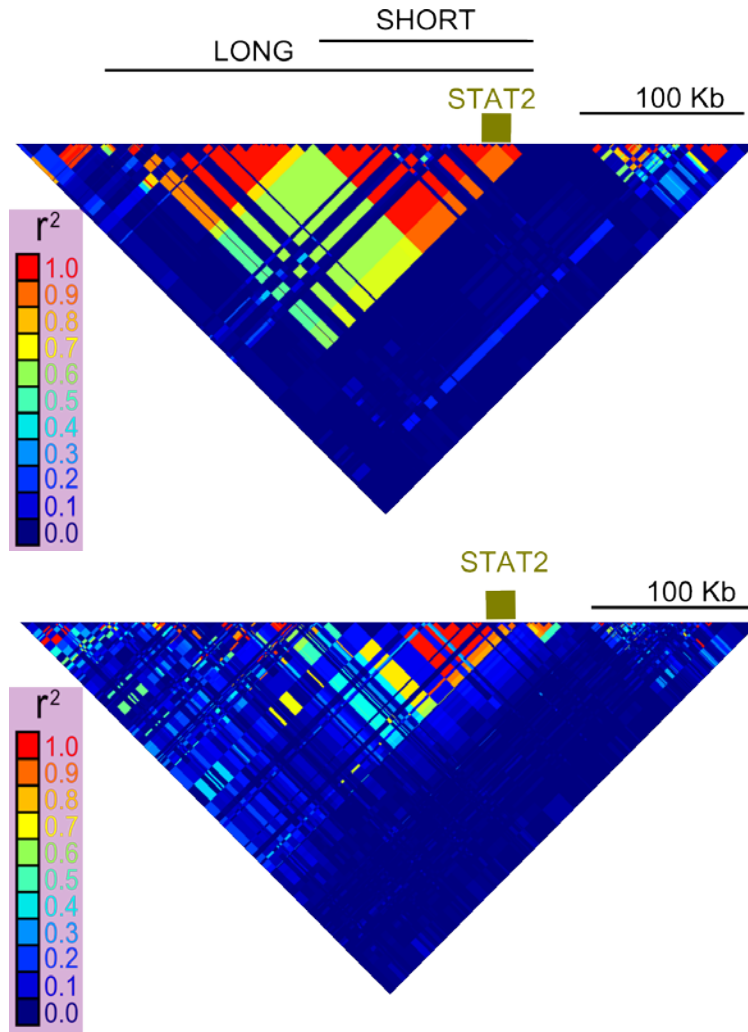

**Figure S3.** Comparison of pairwise linkage disequilibrium measured with  $r^2$  for Japanese (upper) and Yoruba (lower) HapMap phase III populations for the sequence spanning from 54780000 to 55281000. Horizontal lines indicate the blocks in **Figure 1**.

Figure S4

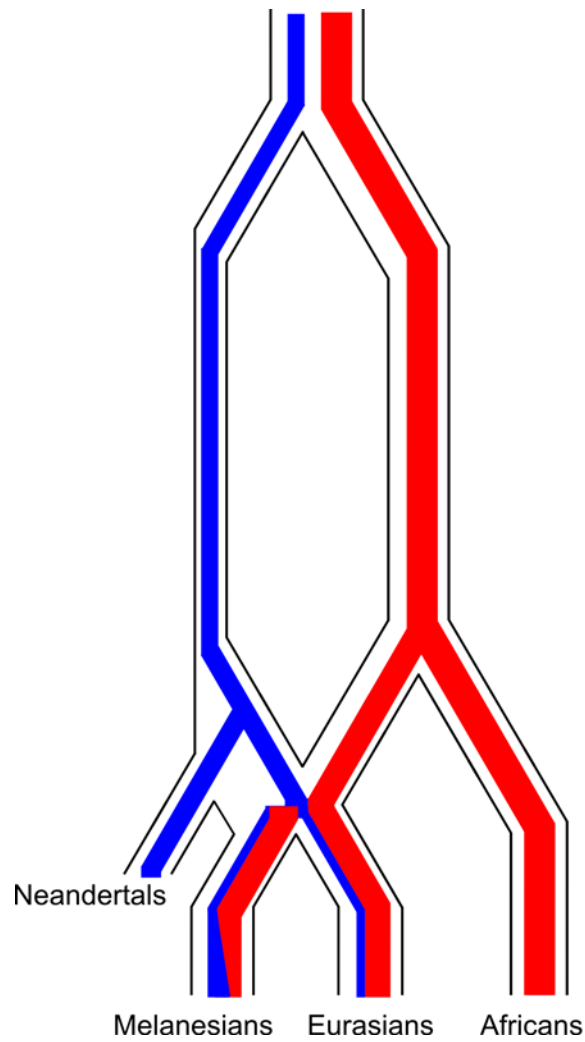

**Figure S4.** Schematic model for the trajectory of the alleles at *STAT2*. The red and blue lines represent lineages that evolved in the ancestors of AMH and Neanderthals, respectively. The Neanderthal lineage introgressed in modern humans after the out of Africa event, remaining originally at low frequency. Subsequently, the frequency of the introgressive lineage increased in Melanesians due to natural selection.

**Table S1a.** Coordinates of amplicons sequenced for 90 individuals of 6 populations (hg18)

| Segment | Beginning | End      | Length (bp) | Distance to the next amplicon (bp) |
|---------|-----------|----------|-------------|------------------------------------|
| STAT2_A | 55021597  | 55022185 | 589         | 984                                |
| STAT2_B | 55023170  | 55024241 | 1072        | 1877                               |
| STAT2_C | 55026119  | 55027026 | 908         | 1546                               |
| STAT2_D | 55028573  | 55031762 | 3190        | 2650                               |
| STAT2_E | 55034413  | 55036756 | 2344        | 3152                               |
| STAT2_F | 55039909  | 55040411 | 503         |                                    |

**Table S1b.** Primer information for amplicons sequenced in this work

| Amplicon    | Upper Name  | Upper Seq                | Lower Name  | Lower Seq               |
|-------------|-------------|--------------------------|-------------|-------------------------|
| STAT2_21466 | STAT2U21466 | TCTAACGGACAGGAGGGGCTAC   | STAT2L23114 | TCAGGGCAGTGGCTTCTTTC    |
| STAT2_23089 | STAT2U23089 | AAAATGTTGAAATCCTTCCATACT | STAT2L24423 | TAACCACCCTACTGCCTCTC    |
| STAT2_26016 | STAT2U26016 | GGAGACTGGAATAGGGCAGC     | STAT2L27037 | AGGGTGTGGGGCGGTGTC      |
| STAT2_28475 | STAT2U28475 | ACCTGTCTTTGCTCTCTCTCCC   | STAT2L28860 | TCTGTCTGTGGCTATCTGTCCC  |
| STAT2_28749 | STAT2U28749 | CAGTATTTGGAATGTGGGCTA    | STAT2L29409 | GGCATAAGAAGGGGATAAACA   |
| STAT2_29214 | STAT2U29214 | CTGAAGGTTTGGGCTGAGCA     | STAT2L29782 | GAACAGGGGTTGGGGGAAGT    |
| STAT2_29638 | STAT2U29638 | ACCTTATTGCTGCCCTTTCC     | STAT2L30956 | TTGACCACTTTCCCCTATCC    |
| STAT2_30514 | STAT2U30514 | GGGCAAAGAGTATGGAAG       | STAT2L31822 | ATCATCTGTAATGTGGGGAA    |
| STAT2_34324 | STAT2U34324 | TGAAGGAGACTGGGCTCTG      | STAT2L35461 | GTGGTAGGAGTTAGGGTTGACAG |
| STAT2_35313 | STAT2U35313 | AATGTGCTTCCTACCTTTGG     | STAT2L36582 | CAGAATCTTGACAGCCCCTT    |
| STAT2_36070 | STAT2U36070 | CACATTTGTTCCCGTCTCCC     | STAT2L36848 | ACTCAACTGGTAGCACTCCCTG  |
| STAT2_39797 | STAT2U39797 | ACATCGTTTTTTTGGTGAAGA    | STAT2L40437 | GACTCCTCCCCTCGTAGAA     |

**Table S2.** SNP array information used to assess the frequency of the N lineage

| Array         | SNPs derived in Neandertal |
|---------------|----------------------------|
| Illumina 650  | rs744051                   |
| Affy 250K Nsp | rs17118439 <sup>a</sup>    |
| Affy 250K Sty | rs2371454                  |
|               | rs871130                   |
|               | rs744051                   |
|               | rs2306694                  |
|               | rs111718065                |

<sup>a</sup> rs17118439 is found in different backgrounds in sub-Saharan Africans and non-Africans.

This SNP was used as diagnostic of the N lineage in non-Africans when Nsp was the only array genotyped in the population.



**Table S3.** Data from table 1 including NA19026 and additional sequence data (see text).

|                |          |   |   |   |   |   |   |   |   |   |          |   |   |   |   |   |   |   |   |   |   |   |   |   |          |          |
|----------------|----------|---|---|---|---|---|---|---|---|---|----------|---|---|---|---|---|---|---|---|---|---|---|---|---|----------|----------|
|                | <b>5</b> | 5 | 5 | 5 | 5 | 5 | 5 | 5 | 5 | 5 | <b>5</b> | 5 | 5 | 5 | 5 | 5 | 5 | 5 | 5 | 5 | 5 | 5 | 5 | 5 | <b>5</b> |          |
|                | <b>4</b> | 5 | 5 | 5 | 5 | 5 | 5 | 5 | 5 | 5 | <b>5</b> | 5 | 5 | 5 | 5 | 5 | 5 | 5 | 5 | 5 | 5 | 5 | 5 | 5 | <b>5</b> |          |
|                | <b>7</b> | 0 | 0 | 0 | 0 | 0 | 0 | 0 | 0 | 0 | <b>0</b> | 0 | 0 | 0 | 0 | 0 | 0 | 0 | 0 | 0 | 0 | 0 | 0 | 0 | <b>0</b> |          |
|                | <b>9</b> | 2 | 2 | 2 | 2 | 2 | 2 | 2 | 2 | 2 | <b>2</b> | 2 | 2 | 2 | 3 | 3 | 3 | 3 | 3 | 3 | 3 | 3 | 3 | 4 | <b>4</b> |          |
|                | <b>9</b> | 2 | 3 | 3 | 4 | 6 | 6 | 6 | 6 | 6 | <b>7</b> | 9 | 9 | 9 | 0 | 0 | 0 | 0 | 0 | 5 | 5 | 5 | 6 | 0 | <b>1</b> |          |
|                | <b>4</b> | 1 | 5 | 7 | 2 | 1 | 2 | 6 | 9 | 9 | <b>4</b> | 2 | 6 | 9 | 3 | 5 | 5 | 6 | 7 | 7 | 7 | 8 | 4 | 0 | <b>3</b> |          |
|                | <b>1</b> | 1 | 2 | 3 | 4 | 2 | 8 | 4 | 4 | 6 | <b>9</b> | 6 | 3 | 6 | 5 | 0 | 4 | 8 | 1 | 6 | 6 | 5 | 7 | 8 | <b>2</b> |          |
|                | <b>2</b> | 4 | 2 | 3 | 0 | 8 | 4 | 7 | 9 | 7 | <b>5</b> | 4 | 4 | 5 | 8 | 2 | 3 | 9 | 2 | 1 | 2 | 9 | 1 | 9 | <b>5</b> |          |
|                | <b>C</b> | G | C | G | G | C | A | C | G | C | <b>A</b> | T | C | T | A | A | G | G | T | A | T | A | C | C | T        | <b>A</b> |
| Neandertal     | A        | * | . | . | . | - | * | . | . | . | .        | . | . | * | * | . | . | A | C | . | . | . | T | * | .        | .        |
| Denisova       | A        | . | . | * | . | . | . | * | . | . | .        | . | . | . | T | . | . | . | . | . | * | . | . | . | .        | .        |
| N              | A        | . | . | . | . | - | - | . | . | . | .        | . | . | . | . | . | A | C | . | . | . | T | A | . | .        | .        |
| D              | *        | . | . | . | . | . | . | . | . | . | *        | . | . | . | T | . | . | . | . | . | . | . | . | . | .        | *        |
| S <sup>a</sup> | .        | . | T | . | . | . | . | T | . | . | G        | . | . | . | . | . | . | . | . | C | G | . | . | . | .        | .        |
| Mb-1           | .        | . | . | . | A | . | . | . | C | . | G        | . | T | . | . | C | . | . | . | . | . | . | . | . | .        | .        |
| Mb-2           | .        | . | . | A | A | . | . | . | C | . | G        | . | T | . | . | C | . | . | . | . | . | . | . | . | .        | .        |
| Mb-3           | .        | . | . | . | A | . | . | . | C | . | G        | . | T | . | C | . | C | . | . | . | . | . | . | . | .        | .        |
| <b>NA19026</b> | .        | . | . | . | . | . | . | . | C | . | G        | . | . | . | . | . | . | . | . | . | . | . | . | . | .        | G        |
| Ma-1           | .        | . | . | . | . | . | . | . | C | . | G        | . | . | . | . | . | . | . | . | . | . | . | . | . | .        | G        |
| Ma-2           | .        | . | . | . | . | . | . | . | C | . | G        | . | . | C | . | . | . | . | . | . | . | . | . | . | .        | G        |
| Ma-3           | .        | . | . | . | . | . | . | . | C | . | G        | . | . | C | . | . | . | . | . | . | . | . | . | . | G        | G        |
| Ma-4           | .        | A | . | . | . | . | . | . | C | . | G        | . | . | C | . | . | . | . | . | . | . | . | . | . | G        | G        |
| Ma-5           | .        | . | . | . | . | . | . | . | C | T | G        | . | . | C | . | . | . | . | . | . | . | . | . | . | G        | G        |
| Ma-6           | .        | . | . | . | . | . | . | . | C | . | G        | C | . | C | . | . | . | . | . | . | . | . | . | . | G        | G        |
| Ma-7           | .        | . | . | . | . | . | . | . | C | . | G        | . | . | C | . | . | . | . | G | . | . | . | . | . | G        | G        |
| Rec N-Mb       | N        | . | . | . | A | . | . | . | C | . | N        | . | . | . | . | . | A | C | . | . | . | T | A | . | N        |          |
| Rec S-M        | N        | . | T | . | . | . | . | T | . | . | N        | . | . | . | . | . | . | . | . | . | . | . | . | . | .        | N        |

\*, low sequenc coverage (ancient DNA) or missing data (lineage D)

<sup>a</sup>: information for the positions shaded was obtained using KB1



|          |           |   |   |   |   |   |   |   |     |     |     |     |       |     |     |     |     |     |       |       |     |   |     |   |   |   |
|----------|-----------|---|---|---|---|---|---|---|-----|-----|-----|-----|-------|-----|-----|-----|-----|-----|-------|-------|-----|---|-----|---|---|---|
| Mandanka | HGDP00908 | . | . | . | . | . | . | . | .   | C . | .   | .   | .     | .   | .   | C . | .   | .   | .     | .     | R . | . | .   | . | . | G |
| Mandanka | HGDP00911 | . | . | . | . | A | . | . | .   | C . | .   | .   | T .   | .   | .   | C . | .   | .   | .     | .     | .   | . | .   | . | . | . |
| Mandanka | HGDP00912 | . | . | . | . | R | . | . | .   | C . | .   | .   | Y Y . | Y . | .   | S . | .   | .   | .     | .     | .   | . | .   | . | . | K |
| Mandanka | HGDP00913 | . | . | . | . | . | . | . | Y   | C . | .   | .   | C .   | C . | .   | .   | .   | .   | .     | .     | .   | . | .   | . | . | G |
| Mandanka | HGDP00914 | K | . | . | . | . | . | . | .   | C . | .   | .   | .     | .   | .   | C . | .   | .   | .     | .     | R . | . | .   | . | . | G |
| Mandanka | HGDP00915 | . | . | . | . | R | . | . | .   | C . | .   | .   | Y Y . | Y . | .   | S . | .   | .   | .     | .     | .   | . | .   | . | K |   |
| Mandanka | HGDP01199 | . | . | . | . | . | . | . | .   | C . | .   | .   | .     | .   | .   | C . | .   | .   | .     | .     | G . | . | .   | . | G |   |
| Mandanka | HGDP01200 | . | . | . | . | . | . | . | .   | C . | .   | .   | .     | .   | .   | C . | .   | .   | .     | .     | .   | . | .   | . | G |   |
| Mandanka | HGDP01202 | . | . | . | . | . | . | . | .   | C . | .   | .   | .     | .   | .   | C . | .   | .   | .     | .     | .   | . | .   | . | G |   |
| Mandanka | HGDP01283 | . | . | . | . | R | . | . | .   | C . | .   | .   | Y .   | Y . | .   | S . | .   | .   | .     | .     | .   | . | .   | . | K |   |
| Mandanka | HGDP01284 | . | . | W | . | A | . | . | .   | C . | .   | .   | T .   | .   | .   | C . | .   | .   | .     | .     | .   | . | .   | . | . |   |
| Mandanka | HGDP01286 | . | . | . | . | . | . | . | .   | C . | .   | .   | Y .   | C . | .   | .   | .   | .   | .     | R .   | .   | . | Y . | . | G |   |
| San      | GM3043    | . | Y | . | . | . | . | Y | .   | S . | .   | .   | .     | .   | Y . | .   | .   | .   | .     | Y R . | .   | . | .   | . | K |   |
| San      | JR013     | . | Y | . | . | . | . | Y | .   | S . | .   | .   | .     | .   | Y . | .   | .   | .   | .     | Y R . | .   | . | .   | . | K |   |
| San      | JR020     | . | Y | . | . | . | . | Y | .   | S . | .   | Y . | Y .   | .   | .   | .   | .   | .   | Y R . | .     | .   | . | .   | K |   |   |
| San      | JR054     | . | . | . | . | . | . | . | .   | C . | .   | S   | Y .   | .   | .   | S . | .   | .   | R .   | .     | .   | . | .   | . | . |   |
| San      | JR077     | . | R | . | . | . | . | . | .   | C . | .   | .   | .     | Y . | Y . | .   | .   | .   | .     | .     | .   | . | .   | . | K |   |
| San      | JR301     | . | Y | . | . | . | . | Y | .   | S . | .   | .   | .     | .   | Y . | .   | .   | .   | Y R . | .     | .   | . | .   | . | K |   |
| San      | JR305     | . | . | . | . | . | . | . | .   | C . | .   | Y . | C .   | .   | .   | .   | .   | .   | .     | .     | .   | . | .   | . | K |   |
| San      | JR321     | . | A | . | . | . | . | . | .   | C . | .   | .   | .     | .   | C . | .   | .   | .   | .     | .     | .   | . | .   | . | G |   |
| San      | JR323     | . | Y | . | . | . | . | Y | .   | S . | .   | .   | .     | .   | Y . | .   | .   | .   | Y R . | .     | .   | . | .   | . | K |   |
| San      | JR354     | . | T | . | . | . | . | T | .   | .   | .   | .   | .     | .   | .   | .   | .   | .   | Y R . | .     | .   | . | .   | . | . |   |
| Papuan   | NG04      | . | . | . | R | N | R | N | .   | S . | .   | Y . | .     | S . | R   | Y . | Y   | .   | Y .   | M .   | .   | . | .   | . | . |   |
| Papuan   | NG06      | . | . | . | R | N | . | N | .   | S . | .   | Y . | .     | S . | R   | Y . | .   | Y . | M .   | .     | .   | . | .   | . | . |   |
| Papuan   | NG07      | . | . | . | R | N | . | N | .   | S . | .   | Y . | .     | S . | R   | Y . | .   | Y . | M .   | .     | .   | . | .   | . | . |   |
| Papuan   | NG13      | . | . | . | . | . | . | . | .   | .   | .   | .   | .     | .   | A   | C . | .   | T . | A .   | .     | .   | . | .   | . | . |   |
| Papuan   | NG14      | . | . | . | . | . | . | . | .   | .   | .   | .   | .     | .   | A   | C . | .   | T . | A .   | .     | .   | . | .   | . | . |   |
| Papuan   | NG15      | . | . | . | R | N | . | N | .   | S . | .   | Y . | .     | S . | R   | Y . | .   | Y . | M .   | .     | .   | . | .   | . | . |   |
| Papuan   | NG17      | . | . | . | . | N | . | N | .   | .   | .   | .   | .     | W   | .   | R   | Y . | Y . | M .   | .     | .   | . | .   | . | . |   |
| Papuan   | NG18      | . | . | . | . | . | . | . | .   | .   | .   | .   | .     | .   | A   | C . | .   | T . | A .   | .     | .   | . | .   | . | . |   |
| Papuan   | NG20      | . | . | . | R | . | . | . | S . | .   | Y . | .   | W     | S . | .   | .   | .   | .   | .     | .     | .   | . | .   | . | . |   |
| Papuan   | NG22      | . | . | . | . | N | . | N | .   | .   | .   | .   | .     | W   | .   | R   | Y . | Y . | M .   | .     | .   | . | .   | . | . |   |
| Papuan   | NG25      | . | . | . | . | . | . | . | .   | .   | .   | .   | .     | .   | A   | C . | .   | T . | A .   | .     | .   | . | .   | . | . |   |

|        |           |   |   |   |   |   |   |   |   |   |   |   |   |   |   |   |   |   |   |
|--------|-----------|---|---|---|---|---|---|---|---|---|---|---|---|---|---|---|---|---|---|
| Papuan | NG26      | . | . | . | A | . | . | . | C | . | . | T | . | . | C | . | . | . | . |
| Papuan | NG29      | . | . | . | R | N | N | . | S | . | . | Y | . | . | S | R | Y | . | W |
| Papuan | NG30      | . | . | . | R | N | N | . | S | . | R | Y | . | . | S | R | Y | . | . |
| Papuan | NG34      | . | . | . | . | . | . | . | . | . | . | . | . | . | A | C | . | . | T |
| Papuan | NG51      | . | . | . | R | N | N | . | S | R | R | Y | . | . | S | R | Y | . | Y |
| Han    | HGDP00774 | . | . | . | A | . | . | . | C | . | . | T | . | . | C | R | . | . | . |
| Han    | HGDP00775 | . | . | . | A | . | . | . | C | . | . | T | . | . | C | . | R | . | . |
| Han    | HGDP00777 | . | . | . | A | . | . | . | C | . | . | T | . | . | C | . | . | . | . |
| Han    | HGDP00778 | . | . | . | A | . | . | . | C | . | . | T | . | . | C | . | . | . | . |
| Han    | HGDP00780 | . | . | . | A | . | . | . | C | . | . | T | . | . | C | . | . | . | . |
| Han    | HGDP00785 | . | . | . | A | . | . | . | C | . | . | T | . | . | C | . | . | . | . |
| Han    | HGDP00786 | . | . | . | A | . | W | . | C | . | . | T | . | . | C | . | . | . | . |
| Han    | HGDP00815 | . | . | . | A | . | . | . | C | . | . | T | . | . | C | . | . | . | . |
| Han    | HGDP00819 | . | . | . | A | . | . | . | C | . | . | T | . | . | C | . | . | . | . |
| Han    | HGDP00977 | . | . | . | A | . | . | . | C | . | . | T | . | . | C | . | . | . | . |
| Han    | HGDP01288 | . | . | . | A | . | . | . | C | . | . | T | . | . | C | . | . | . | . |
| Han    | HGDP01290 | . | . | . | A | . | . | . | C | . | . | T | . | . | C | . | . | . | . |
| Han    | HGDP01293 | . | . | . | A | . | . | . | C | . | . | T | . | . | C | . | . | . | . |
| Han    | HGDP01294 | . | S | . | A | . | . | . | C | . | . | Y | . | . | S | R | Y | . | Y |
| Han    | HGDP01295 | . | . | . | A | . | . | . | C | . | . | T | . | . | C | . | . | . | . |
| Han    | HGDP01296 | . | . | . | A | . | . | . | C | . | . | T | . | . | C | . | . | . | . |
| Basque | HGDP01357 | . | . | . | A | . | . | . | C | . | . | T | . | . | C | . | . | . | . |
| Basque | HGDP01358 | . | . | . | A | . | . | . | C | . | . | T | . | . | C | . | . | . | . |
| Basque | HGDP01359 | . | . | . | R | N | N | . | S | . | . | Y | . | . | S | R | Y | . | Y |
| Basque | HGDP01360 | . | . | . | R | A | . | . | C | . | . | T | . | . | C | . | . | . | . |
| Basque | HGDP01361 | . | . | . | A | . | . | . | C | K | . | T | . | . | C | . | . | . | . |
| Basque | HGDP01362 | . | . | M | R | A | . | . | C | . | . | T | . | . | C | . | . | . | R |
| Basque | HGDP01364 | . | . | . | A | . | . | . | C | . | . | T | M | . | C | . | . | . | . |
| Basque | HGDP01370 | . | . | . | A | . | . | . | C | . | . | T | . | . | C | . | . | . | . |
| Basque | HGDP01371 | . | . | . | R | N | N | . | S | . | . | Y | . | . | S | R | Y | . | Y |
| Basque | HGDP01372 | . | . | . | A | . | . | . | C | . | . | T | M | . | C | . | . | . | . |
| Basque | HGDP01374 | . | . | . | A | . | . | . | C | . | . | T | . | . | C | . | . | . | . |
| Basque | HGDP01375 | . | . | . | R | A | . | . | C | . | . | T | M | . | C | . | . | . | . |

|        |           |   |   |   |   |   |   |   |   |   |   |   |   |   |   |   |   |   |   |   |   |   |   |   |   |   |   |   |   |   |   |   |   |
|--------|-----------|---|---|---|---|---|---|---|---|---|---|---|---|---|---|---|---|---|---|---|---|---|---|---|---|---|---|---|---|---|---|---|---|
| Basque | HGDP01376 | . | . | . | R | A | . | . | . | . | C | . | . | . | T | . | . | . | . | C | . | . | . | . | . | . | . | . | . | . | . |   |   |
| Basque | HGDP01377 | . | . | . | . | A | . | . | . | . | C | . | . | . | T | . | . | . | . | C | . | . | . | . | . | . | . | . | S | . | . |   |   |
| Basque | HGDP01378 | . | . | . | . | R | N | . | N | . | S | . | . | . | Y | . | . | . | . | S | R | Y | . | . | . | . | . | . | Y | . | M | . | . |
| Basque | HGDP01379 | . | . | . | . | A | . | . | . | . | C | . | . | . | T | . | . | . | . | C | . | . | . | . | . | . | . | . | . | . | . |   |   |

<sup>a</sup> the ancestral state was inferred using chimpanzee

<sup>b</sup> colors are used to represent function of the polymorphisms: yellow (non-synonymous), brown (synonymous) and green (UTR)

N, heterozygous indel; -, homozygous indel; \* no sequence coverage

**Table S5.** Analysis of sites between 54770000 and 54913000 that differ between NA18956 and the reference sequence

| SNPs present in NA18956 | State in HGDP00542 <sup>a,b,c</sup> | State in Neandertal <sup>a,b,c</sup> | State in Denisova <sup>a,b,c</sup> | State in Reference <sup>a</sup> | Sequence coverage in Chimpanzee |
|-------------------------|-------------------------------------|--------------------------------------|------------------------------------|---------------------------------|---------------------------------|
| 54771772                | 1(3)[60]                            | 1(5)[254]                            | 0 (1)[37]                          | 0                               | YES                             |
| 54779342                | 1(3)[60]                            | -1                                   | 1(3)[37]                           | 0                               | YES                             |
| 54781290                | 1(6)[60]                            | -1                                   | 0(7)[37]                           | 0                               | YES                             |
| 54784285                | 0(2)[37]                            | 0(1,1)[151,170]                      | 0(1)[37]                           | 1                               | YES                             |
| 54786849                | 0(5)[60]                            | 1(3)[254]                            | 1(1)[37]                           | 1                               | YES                             |
| 54787283                | 0(1)[60]                            | -1                                   | -1                                 | 1                               | YES                             |
| 54791507                | 0(4)[60]                            | -1                                   | 0(6)[37]                           | 1                               | YES                             |
| 54791929                | 0(3)[60]                            | 1(1)[19]                             | 1(2)[0]                            | 1                               | YES                             |
| 54792771                | 1(4)[60]                            | 1(2)[254]                            | 0(2)[37]                           | 0                               | YES                             |
| 54793758                | 0(5)[60]                            | 0(1)[21]                             | -1                                 | 1                               | YES                             |
| 54794205                | 1(2)[60]                            | 1(3,1)[254]                          | 1(3)[37]                           | 0                               | YES                             |
| 54794749                | 0(2)[60]                            | 0(2)[254]                            | 0(2)[37]                           | 0                               | YES                             |
| 54795088                | 0(5)[60]                            | 0(2)[254]                            | 0(2)[37]                           | 1                               | YES                             |
| 54795802                | 1(5)[60]                            | 1(3)[254]                            | 0(1)[37]                           | 0                               | YES                             |
| 54796112                | 0(2)[60]                            | 0(2,1)[55,13]                        | -1                                 | 1                               | YES                             |
| 54796575                | 0(3)[60]                            | 0(1)[254]                            | 0(2)[37]                           | 1                               | YES                             |
| 54796904                | 0(3)[60]                            | 0(3)[254]                            | 0(1)[37]                           | 1                               | YES                             |
| 54797619                | 0(1)[37]                            | -1                                   | 0(11)[0]                           | 0                               | YES                             |
| 54798525                | 1(1,1)[37,37]                       | 1(2)[254]                            | 1(4)[37]                           | 0                               | YES                             |
| 54798855                | 0(3)[60]                            | -1                                   | 0(5)[37]                           | 1                               | YES                             |
| 54798938                | 0(4)[60]                            | 0(3)[254]                            | 0(4)[37]                           | 1                               | YES                             |
| 54799058                | 1(4)[60]                            | 1(1)[254]                            | 1(2)[37]                           | 0                               | YES                             |
| 54799412                | 1(4)[60]                            | 1(3)[254]                            | 1(2)[37]                           | 0                               | YES                             |
| 54799972                | 0(4)[60]                            | 0(1)[157]                            | 0(3)[37]                           | 1                               | YES                             |
| 54802423                | 0(6)[60]                            | 0(4)[254]                            | 0(10)[37]                          | 1                               | YES                             |
| 54802836                | 1(5)[60]                            | 1(1)[165]                            | 0(3)[37]                           | 0                               | YES                             |
| 54804669                | 1(6)[60]                            | -1                                   | -1                                 | 0                               | YES                             |
| 54804675                | 0(6)[60]                            | 0(1)[254]                            | -1                                 | 0                               | YES                             |

|          |           |                 |              |    |     |
|----------|-----------|-----------------|--------------|----|-----|
| 54806067 | 1(1)[37]  | -1              | 0(8)[0]      | 0  | YES |
| 54806086 | 0(1)[37]  | -1              | 0(2,4)[0,0]  | 1  | YES |
| 54806099 | 0(1)[37]  | -1              | 0(2,1)[0,0]  | 1  | YES |
| 54806359 | 0(7)[60]  | -1              | 0(5)[37]     | 1  | YES |
| 54808625 | 0(6)[60]  | 0(1)[254]       | 0(2)[37]     | 0  | YES |
| 54809324 | 1(3)[60]  | -1              | 1(1)[37]     | 0  | YES |
| 54810243 | 0(5)[60]  | -1              | 0(5,1)[37,0] | 1  | YES |
| 54815898 | 0(3)[37]  | -1              | 0(1,1)[23,0] | 1  | YES |
| 54817021 | 0(3)[37]  | 2(1)[254]       | 0(1)[37]     | 1  | YES |
| 54817040 | 1(3)[60]  | -1              | 1(1)[37]     | 0  | YES |
| 54817421 | 0(9)[60]  | 0(3)[254]       | 0(1)[37]     | 1  | YES |
| 54818387 | 1(8)[60]  | 1(2)[254]       | 0(3)[37]     | 0  | YES |
| 54818985 | 1(4)[60]  | 1(4)[254]       | 1(3)[37]     | 0  | YES |
| 54821519 | 0(1)[60]  | -1              | 0(3,1)[37,0] | 1  | YES |
| 54825834 | -1        | 0(1)[20]        | 1(2)[0]      | 1  | YES |
| 54825865 | 0(1)[37]  | 0(2)[20]        | 0(1)[0]      | 0  | YES |
| 54825880 | 0(1)[37]  | 1(5)[20]        | 0(1,3)[37,0] | 1  | YES |
| 54825998 |           |                 |              | -1 | NO  |
| 54826091 |           |                 |              | -1 | NO  |
| 54826861 | 0(10)[60] | -1              | 0(4)[37]     | 1  | YES |
| 54826902 | 0(7)[60]  | 0(1)[254]       | 0(4)[37]     | 0  | YES |
| 54827331 | 0(7)[60]  | 0(3,1)[153,133] | 0(5)[37]     | 0  | YES |
| 54829254 | 0(3)[60]  | -1              | 0(4)[37]     | 1  | YES |
| 54829965 | 0(4)[60]  | 0(1)[254]       | -1           | 1  | YES |
| 54831174 | 1(2)[60]  | -1              | 0(10)[37]    | 0  | YES |
| 54833077 | 1(3)[60]  | 1(3)[254]       | 0(3)[37]     | 0  | YES |
| 54834417 | 1(10)[60] | -1              | 1(1)[37]     | 0  | YES |
| 54835343 | 1(6)[60]  | 1(3)[254]       | 0(2)[37]     | 0  | YES |
| 54839093 | 1(8)[60]  | 1(3)[254]       | 0(2)[37]     | 0  | YES |
| 54839218 | 1(5)[60]  | 1(1)[254]       | 0(4)[37]     | 0  | YES |
| 54840207 | 1(10)[60] | -1              | 0(4)[37]     | 0  | YES |
| 54842900 | 1(15)[60] | 1(2)[254]       | 1(3)[37]     | 0  | YES |
| 54846601 |           |                 |              | -1 | NO  |

|          |          |           |               |    |     |
|----------|----------|-----------|---------------|----|-----|
| 54847508 | 0(3)[60] | 0(1)[5]   | 0(4)[37]      | 1  | YES |
| 54848757 | 0(3)[60] | -1        | 0(1)[37]      | 1  | YES |
| 54849129 | 1(3)[60] | 0(1)[19]  | 0(2)[0]       | 0  | YES |
| 54851078 | 1(5)[60] | 1(1)[254] | 1(4)[37]      | 1  | YES |
| 54851607 | 0(4)[60] | 0(4)[254] | 0(3,1)[37,23] | 1  | YES |
| 54851659 | 0(3)[60] | 0(5)[254] | 0(3)[37]      | 0  | YES |
| 54855674 | 1(6)[60] | -1        | 1(1)[37]      | 0  | YES |
| 54855891 | 0(8)[60] | -1        | 0(1)[37]      | 1  | YES |
| 54855905 | 0(8)[60] | -1        | -1            | 1  | YES |
| 54857604 | 0(5)[60] | -1        | 0(2)[37]      | 0  | YES |
| 54862009 | 0(4)[60] | 0(1)[254] | 0(6)[37]      | 1  | YES |
| 54862562 | 1(4)[60] | -1        | -1            | 0  | YES |
| 54863461 | 1(3)[37] | 0(1)[6]   | 0(5)[37]      | 0  | YES |
| 54864585 | 0(6)[60] | 0(1)[254] | 0(1)[37]      | 1  | YES |
| 54865290 | 1(7)[60] | -1        | 1(3,2)[37,0]  | 0  | YES |
| 54867835 | 0(3)[60] | 0(2)[215] | 0(2)[37]      | 1  | YES |
| 54868459 | 1(3)[60] | 1(1)[254] | 0(1)[37]      | 0  | YES |
| 54870091 | 1(3)[60] | -1        | 1(1)[37]      | 1  | YES |
| 54870352 | 1(4)[60] | -1        | 1(3)[37]      | 0  | YES |
| 54872419 | 0(3)[60] | -1        | 0(2)[37]      | 0  | YES |
| 54872516 | 0(7)[60] | 0(4)[254] | 0(7)[37]      | 0  | YES |
| 54872565 | 1(5)[60] | 1(1)[254] | 1(4)[37]      | 1  | YES |
| 54872711 | 0(4)[60] | 0(3)[254] | 0(3)[37]      | 0  | YES |
| 54872732 | 1(6)[60] | 1(1)[254] | 0(4)[37]      | 0  | YES |
| 54873263 | 1(2)[37] | 1(1)[254] | 0(1)[37]      | 0  | YES |
| 54873843 | 1(5)[60] | -1        | 1(2)[37]      | 1  | YES |
| 54874720 |          |           |               | -1 | NO  |
| 54875251 |          |           |               | -1 | NO  |
| 54875494 |          |           |               | -1 | NO  |
| 54876082 |          |           |               | -1 | NO  |
| 54876735 | 1(1)[37] | -1        | 0(9)[0]       | 0  | YES |
| 54876817 | 0(1)[37] | -1        | 0(4)[0]       | 0  | YES |
| 54877170 | 1(2)[60] | -1        | -1            | 0  | YES |



|          |               |           |           |    |     |
|----------|---------------|-----------|-----------|----|-----|
| 54878246 | 0(4)[60]      | 0(3)[76]  | 0(1)[37]  | 0  | YES |
| 54878600 | 0(2)[60]      | -1        | 0(3)[37]  | 1  | YES |
| 54879298 | 0(4)[60]      | 0(2)[254] | 0(3)[37]  | 0  | YES |
| 54880167 | 0(4)[60]      | 0(1)[249] | -1        | 1  | YES |
| 54880208 | 0(1)[60]      | 0(3)[163] | 0(4)[37]  | 0  | YES |
| 54880433 | 0(2)[60]      | 0(1)[8]   | 1(1)[0]   | 1  | YES |
| 54880766 |               |           |           | -1 | NO  |
| 54880785 |               |           |           | -1 | NO  |
| 54881278 | 0(2)[60]      | -1        | 0(2)[37]  | 0  | YES |
| 54882258 | 0(2)[60]      | -1        | -1        | 1  | YES |
| 54883246 | 0(6,3)[60,60] | 0(1)[254] | 0(1)[37]  | 0  | YES |
| 54883451 | 0(5)[37]      | -1        | 0(1)[37]  | 1  | YES |
| 54883755 | 0(2,1)[60,37] | -1        | -1        | 0  | YES |
| 54883787 | 0(3)[60]      | -1        | -1        | 1  | YES |
| 54883850 | 0(1)[60]      | -1        | 0(11)[37] | 0  | YES |
| 54884311 | 0(2,4)[60,60] | 0(1)[254] | 0(3)[37]  | 0  | YES |
| 54887504 | 0(1,1)[60,37] | -1        | 1(4)[37]  | 1  | YES |
| 54888006 | 0(3)[37]      | -1        | 0(2)[37]  | 1  | YES |
| 54888776 | 1(4,2)[60,50] | -1        | 0(1)[0]   | 0  | YES |
| 54889163 | 1(1)[60]      | 0(1)[0]   | 0(2)[37]  | 0  | YES |
| 54889333 | 1(4,5)[60,60] | 2(1)[254] | -1        | 0  | YES |
| 54889488 | 0(5,4)[60,37] | 1(3)[38]  | -1        | 1  | YES |
| 54890032 | 1(1)[60]      | -1        | 0(3)[37]  | 0  | YES |
| 54890101 | 1(2)[60]      | -1        | -1        | 1  | YES |
| 54890687 | 1(2)[37]      | -1        | 1(3)[37]  | 0  | YES |
| 54890740 | 0(5,2)[60,37] | 0(1)[245] | 1(5)[37]  | 1  | YES |
| 54890756 | 1(4,1)[60,37] | -1        | 1(3)[37]  | 0  | YES |
| 54890963 | 0(3,1)[60,37] | -1        | 0(2)[37]  | 0  | YES |
| 54891487 | 1(3,1)[60,60] | 0(1)[254] | -1        | 0  | YES |
| 54893226 | 1(4,2)[60,60] | -1        | 0(1)[37]  | 0  | YES |
| 54894194 | 1(3)[60]      | 0(1)[245] | 0(5)[37]  | 0  | YES |
| 54894974 | 0(7)[60]      | 2(1)[254] | 0(2)[37]  | 1  | YES |
| 54895775 | 0(4)[60]      | 0(2)[100] | -1        | 0  | YES |

|          |               |               |               |    |     |
|----------|---------------|---------------|---------------|----|-----|
| 54896152 | 1(1)[60]      | 1(1)[18]      | 1(1)[37]      | 1  | YES |
| 54897521 | 1(1,2)[60,60] | 1(1)[24]      | 1(2,1)[37,37] | 0  | YES |
| 54898424 | 1(5,1)[60,37] | 1(3,1)[248,2] | 1(3)[37]      | 0  | YES |
| 54898578 | 0(3)[60]      | -1            | 0(2)[37]      | 1  | YES |
| 54899250 | 0(2)[60]      | -1            | -1            | 0  | YES |
| 54900548 |               |               |               | -1 | NO  |
| 54900910 | 0(1)[37]      | -1            | 0(3)[37]      | 0  | YES |
| 54901530 | 0(5)[60]      | 0(1)[254]     | 0(2)[37]      | 1  | YES |
| 54902174 | 0(2)[37]      | 0(1)[230]     | 0(2)[37]      | 1  | YES |
| 54904365 | 0(1)[60]      | 0(1)[40]      | 0(6)[37]      | 0  | YES |
| 54906867 |               |               |               | -1 | NO  |
| 54907064 |               |               |               | -1 | NO  |
| 54907309 | 1(1)[60]      | 0(2)[55]      | 0(2)[37]      | 0  | YES |
| 54907336 | 0(1)[37]      | 1(9)[55]      | 1(3)[37]      | 1  | YES |
| 54907404 | 0(7)[60]      | 0(1)[3]       | -1            | 0  | YES |
| 54908240 | 0(2,1)[60,60] | 1(1)[55]      | -1            | 1  | YES |
| 54909614 | 0(1,2)[60,37] | 0(2)[53]      | 1(1)[0]       | 1  | YES |
| 54911312 | 0(6)[60]      | 0(2)[254]     | 0(3)[37]      | 1  | YES |
| 54911960 | 0(10)[60]     | 2(1)[6]       | -1            | 0  | YES |

<sup>a</sup> 0,1,-1 and 2 indicate respectively, ancestral state, derived state, no call, and call differing from the alleles in NA18956

<sup>b</sup> In parenthesis, the number of reads supporting the call; when both calls are present, the number of reads supporting the alternative call is given after the comma

<sup>c</sup> In brackets, maximum alignment quality of a read supporting the call; maximum quality for a second call is given after the comma

**Table S6.** Frequency of the N lineage<sup>a</sup>

| N haplotype           |            |           |               | Long Variant of N |                 |      |
|-----------------------|------------|-----------|---------------|-------------------|-----------------|------|
| Geographic Region     | Population | Frequency | N             | N                 | N               |      |
| (source) <sup>b</sup> |            |           | (individuals) | (individuals)     | (# chromosomes) | Freq |
| <b>Western Europe</b> |            |           |               |                   |                 |      |
| Kayser                | Rotterdam  | 0.068     | 280           | 0                 | NA              | NA   |
|                       | Helsinki   | 0.074     | 47            | 0                 | NA              | NA   |
|                       | Lyon       | 0.090     | 50            | 0                 | NA              | NA   |
|                       | Ngreece    | 0.069     | 51            | 0                 | NA              | NA   |
|                       | Ancona     | 0.031     | 49            | 0                 | NA              | NA   |
|                       | Førde      | 0.096     | 52            | 0                 | NA              | NA   |
|                       | Warsawa    | 0.122     | 49            | 0                 | NA              | NA   |
|                       | Uppsala    | 0.098     | 46            | 0                 | NA              | NA   |
|                       | Barcelona  | 0.021     | 47            | 0                 | NA              | NA   |
|                       | Prague     | 0.078     | 45            | 0                 | NA              | NA   |
| HGDP                  | Basque     | 0.063     | 24            | 24                | 0               | 0.00 |
|                       | French     | 0.036     | 28            | 28                | 0               | 0.00 |
|                       | Italian    | 0.038     | 13            | 12                | 0               | 0.00 |
|                       | Russian    | 0.120     | 25            | 25                | 0               | 0.00 |
|                       | Sardinian  | 0.018     | 28            | 28                | 0               | 0.00 |
|                       | Tuscan     | 0.000     | 8             | 7                 | 0               | 0.00 |
|                       | Orcadian   | 0.100     | 15            | 15                | 0               | 0.00 |
| Jorde                 | Slovenian  | 0.096     | 26            | 0                 | NA              | NA   |
|                       | N_european | 0.065     | 23            | 0                 | NA              | NA   |
| HapMap                | CEU        | 0.092     | 60            | 117               | 0               | 0.00 |

|                       |               |       |    |  |    |    |      |
|-----------------------|---------------|-------|----|--|----|----|------|
|                       | TSI           | 0.100 | 25 |  | 88 | 0  | 0.00 |
| <b>Eastern Europe</b> |               |       |    |  |    |    |      |
| HGDP                  | Adygei        | 0.059 | 17 |  | 17 | 0  | 0.00 |
| Jorde                 | Stalskoe      | 0.100 | 5  |  | 0  | NA | NA   |
|                       | Urkarah       | 0.111 | 18 |  | 0  | NA | NA   |
| <b>Western Asia</b>   |               |       |    |  |    |    |      |
| HGDP                  | Bedouin       | 0.000 | 46 |  | 45 | 0  | 0.00 |
|                       | Druze         | 0.000 | 42 |  | 42 | 0  | 0.00 |
|                       | Palestinian   | 0.032 | 47 |  | 46 | 0  | 0.00 |
| Jorde                 | Kurd          | 0.000 | 24 |  | 0  | NA | NA   |
| <b>South Asia</b>     |               |       |    |  |    |    |      |
| HGDP                  | Balochi       | 0.021 | 24 |  | 24 | 0  | 0.00 |
|                       | Brahui        | 0.060 | 25 |  | 25 | 0  | 0.00 |
|                       | Burusho       | 0.000 | 25 |  | 25 | 0  | 0.00 |
|                       | Hazara        | 0.091 | 22 |  | 22 | 0  | 0.00 |
|                       | Kalash        | 0.000 | 23 |  | 23 | 0  | 0.00 |
|                       | Makrani       | 0.020 | 25 |  | 25 | 0  | 0.00 |
|                       | Pathan        | 0.000 | 22 |  | 22 | 0  | 0.00 |
|                       | Sindhi        | 0.042 | 24 |  | 24 | 0  | 0.00 |
| Jorde                 | Tamil-Nadu    | 0.000 | 27 |  | 0  | NA | NA   |
|                       | Andra Pradesh | 0.022 | 46 |  | 0  | NA | NA   |
|                       | Pakistani     | 0.060 | 25 |  | 0  | NA | NA   |
|                       | Irula         | 0.063 | 24 |  | 0  | NA | NA   |
|                       | Nepalese      | 0.083 | 24 |  | 0  | NA | NA   |
| <b>Central Asia</b>   |               |       |    |  |    |    |      |
| Jorde                 | Kyrgystani    | 0.040 | 25 |  | 0  | NA | NA   |
| <b>Southeast Asia</b> |               |       |    |  |    |    |      |

|                  |            |       |    |  |    |    |      |
|------------------|------------|-------|----|--|----|----|------|
| HGDP             | Cambodian  | 0.050 | 10 |  | 10 | 0  | 0.00 |
| Jorde            | Iban       | 0.140 | 25 |  | 0  | NA | NA   |
|                  | Vietnamese | 0.000 | 7  |  | 0  | NA | NA   |
|                  | Cambodian  | 0.100 | 5  |  | 0  | NA | NA   |
|                  | Thai       | 0.083 | 24 |  | 0  | NA | NA   |
| <b>East Asia</b> |            |       |    |  |    |    |      |
| HGDP             | Dai        | 0.000 | 10 |  | 10 | 0  | 0.00 |
|                  | Daur       | 0.167 | 9  |  | 9  | 1  | 0.06 |
|                  | Han        | 0.015 | 34 |  | 34 | 0  | 0.00 |
|                  | Han-NChina | 0.000 | 10 |  | 10 | 0  | 0.00 |
|                  | Hezhen     | 0.000 | 10 |  | 9  | 0  | 0.00 |
|                  | Japanese   | 0.054 | 28 |  | 28 | 0  | 0.00 |
|                  | Lahu       | 0.167 | 9  |  | 8  | 1  | 0.06 |
|                  | Miao       | 0.050 | 10 |  | 10 | 0  | 0.00 |
|                  | Mongola    | 0.000 | 10 |  | 10 | 0  | 0.00 |
|                  | Naxi       | 0.167 | 9  |  | 8  | 1  | 0.06 |
|                  | Oroqen     | 0.056 | 9  |  | 9  | 0  | 0.00 |
|                  | She        | 0.000 | 10 |  | 10 | 0  | 0.00 |
|                  | Tu         | 0.050 | 10 |  | 10 | 0  | 0.00 |
|                  | Tujia      | 0.050 | 10 |  | 10 | 0  | 0.00 |
|                  | Uyгур      | 0.000 | 10 |  | 10 | 0  | 0.00 |
|                  | Xibo       | 0.111 | 9  |  | 9  | 0  | 0.00 |
|                  | Yi         | 0.150 | 10 |  | 10 | 2  | 0.10 |
| Jorde            | Japanese   | 0.042 | 12 |  | 0  | NA | NA   |
|                  | Taiwan     | 0.000 | 3  |  | 0  | NA | NA   |
|                  | Chinese    | 0.000 | 7  |  | 0  | NA | NA   |
| HapMap           | CHB        | 0.022 | 45 |  | 84 | 2  | 0.01 |

|                           |                   |       |    |  |    |    |      |
|---------------------------|-------------------|-------|----|--|----|----|------|
|                           | JPT               | 0.089 | 45 |  | 86 | 7  | 0.04 |
| <b>North Asia</b>         |                   |       |    |  |    |    |      |
| HGDP                      | Yakut             | 0.040 | 25 |  | 25 | 0  | 0.00 |
| Jorde                     | Buryat            | 0.000 | 25 |  | 0  | NA | NA   |
| <b>America</b>            |                   |       |    |  |    |    |      |
| HGDP                      | Karitiana         | 0.000 | 13 |  | 13 | 0  | 0.00 |
|                           | Maya              | 0.048 | 21 |  | 21 | 0  | 0.00 |
|                           | Pima              | 0.111 | 18 |  | 14 | 0  | 0.00 |
|                           | Surui             | 0.000 | 9  |  | 8  | 0  | 0.00 |
| Jorde                     | Colombian         | 0.125 | 8  |  | 0  | NA | NA   |
|                           | Bolivian          | 0.022 | 23 |  | 0  | NA | NA   |
|                           | Totonac           | 0.042 | 24 |  | 0  | NA | NA   |
| <b>Melanesia</b>          |                   |       |    |  |    |    |      |
| HGDP                      | Papuan            | 0.588 | 17 |  | 17 | 17 | 0.50 |
|                           | Melanesian        | 0.438 | 16 |  | 11 | 5  | 0.23 |
| This work                 | Papuan            | 0.641 | 32 |  | 0  | NA | NA   |
| Jorde                     | Samoa             | 0.423 | 13 |  | 0  | NA | NA   |
|                           | Tonga             | 0.278 | 9  |  | 0  | NA | NA   |
| This work                 | Vanuatu           | 0.652 | 23 |  | 0  | NA | NA   |
|                           | New-Britain       | 0.725 | 20 |  | 0  | NA | NA   |
| <b>North Africa</b>       |                   |       |    |  |    |    |      |
| HGDP                      | Mozabite          | 0.111 | 27 |  | 27 | 0  | 0.00 |
| <b>Sub-Saharan Africa</b> |                   |       |    |  |    |    |      |
| HGDP                      | Bantu Kenya       | 0.000 | 12 |  | 11 | 0  | 0.00 |
|                           | Bantu SouthAfrica | 0.000 | 8  |  | 8  | 0  | 0.00 |
|                           | Biaka             | 0.000 | 25 |  | 22 | 0  | 0.00 |
|                           | Mandenka          | 0.000 | 22 |  | 22 | 0  | 0.00 |

|  |        |       |    |  |    |   |      |
|--|--------|-------|----|--|----|---|------|
|  | Mbuti  | 0.000 | 14 |  | 13 | 0 | 0.00 |
|  | San    | 0.000 | 6  |  | 5  | 0 | 0.00 |
|  | Yoruba | 0.000 | 21 |  | 21 | 0 | 0.00 |

<sup>a</sup>The Neandertal haplotype was determined by genotyping of one or several diagnostic SNPs

<sup>b</sup>Data sources are 14 and 15 for HGDP (supplemented in some cases), 16 for Kayser, and 17 for Jorde and HapMap
